# Supplementary material for: Adding open spectral data to MassBank and PubChem using open source tools to support non-targeted exposomics of mixtures
Source: PubMed Central journal article supplement (PMC10648001; doi:10.1039/d3em00181d), 2023-07-10
Supplement: EM-025-D3EM00181D-s001.pdf [file EM-025-D3EM00181D-s001.pdf]

## Adding Open Spectral Data to MassBank and PubChem Using Open Source Tools to Support Non-Targeted Exposomics of Mixtures

Anjana Elapavalore<sup>1\*</sup>, Todor Kondić<sup>1</sup>, Randolph R. Singh<sup>1,2</sup>, Benjamin A. Shoemaker<sup>3</sup>,  
Paul A. Thiessen<sup>3</sup>, Jian Zhang<sup>3</sup>, Evan E. Bolton<sup>3</sup>, Emma L. Schymanski<sup>1\*</sup>

<sup>1</sup> Luxembourg Centre for Systems Biomedicine (LCSB), University of Luxembourg, 6 Avenue du Swing, 4367, Belvaux, Luxembourg. ORCIDs AE: [0000-0002-0295-6618](#); TK: [0000-0001-6662-4375](#); ELS: [0000-0001-6868-8145](#).

<sup>2</sup> IFREMER (Institut Français de Recherche pour l'Exploitation de la Mer), Laboratoire Biogéochimie des Contaminants Organiques, Rue de l'Île d'Yeu, BP 21105, Nantes Cedex 3, 44311, France. ORCID RRS: [0000-0003-4500-3400](#).

<sup>3</sup> National Center for Biotechnology Information (NCBI), National Library of Medicine (NLM), National Institutes of Health (NIH), Bethesda, MD, 20894, USA. ORCIDs BAS: [0000-0002-1356-285X](#); PAT: [0000-0002-1992-2086](#); JZ: [0000-0002-6192-4632](#); EEB: [0000-0002-5959-6190](#).

\* Correspondence: AE: [anjana.elapavalore@uni.lu](mailto:anjana.elapavalore@uni.lu) and ELS: [emma.schymanski@uni.lu](mailto:emma.schymanski@uni.lu)

### Supplementary Information

This section contains three additional figures (Figures S1-S3) and a table (Table S1) in the following pages to support the article contents.

## Config

### Import

The list of knowns. Required columns: ID, SMILES, Name and RT (the last two can be empty). Remember to quote SMILES and Name entries!

  

The list of unknowns. Required columns: ID, mz and RT (RT can be empty).

  

Set table. Required columns ID and set.

### Raw Files in mzML Format

Use this file table to assign adduct modes and tags to the data files.

  

|   | Files                                                    | mode | set      | tag |
|---|----------------------------------------------------------|------|----------|-----|
| 1 | ix499_neg/mzML's/20200303_ENTACT_RP_mix499_neg_CE15.mzML | mH   | mix499_M | 15  |
| 2 | ix499_neg/mzML's/20200303_ENTACT_RP_mix499_neg_CE30.mzML | mH   | mix499_M | 30  |
| 3 | ix499_neg/mzML's/20200303_ENTACT_RP_mix499_neg_CE45.mzML | mH   | mix499_M | 45  |
| 4 | ix499_neg/mzML's/20200303_ENTACT_RP_mix499_neg_CE60.mzML | mH   | mix499_M | 60  |
| 5 | ix499_neg/mzML's/20200303_ENTACT_RP_mix499_neg_CE75.mzML | mH   | mix499_M | 75  |
| 6 | ix499_neg/mzML's/20200303_ENTACT_RP_mix499_neg_CE90.mzML | mH   | mix499_M | 90  |

Figure S1: ShinyScreen Input Configuration.

## Spectra Extraction and Automatic QA

### A Extract Spectra

Number of processes:

Precursor m/z error (coarse) (+/-):  [Da]

Precursor m/z error (fine) (+/-):  [ppm]

EIC m/z error (+/-):  [Da]

Retention time tolerance (+/-):  [min]

Select set(s).

### Processed Sets

| set      | extracted                           | qa                       | ms2                                 |
|----------|-------------------------------------|--------------------------|-------------------------------------|
| mix499_M | <input checked="" type="checkbox"/> | <input type="checkbox"/> | <input checked="" type="checkbox"/> |

### B Automatic Quality Control

Intensity threshold (MS1):

Intensity threshold (MS2):

Signal-to-noise ratio:

Retention time shift tolerance (+/-):  [min]

Figure S2: Spectral Extraction and Prescreening with ShinyScreen. A) Spectral Extraction Settings B) Automatic Quality Control Settings.

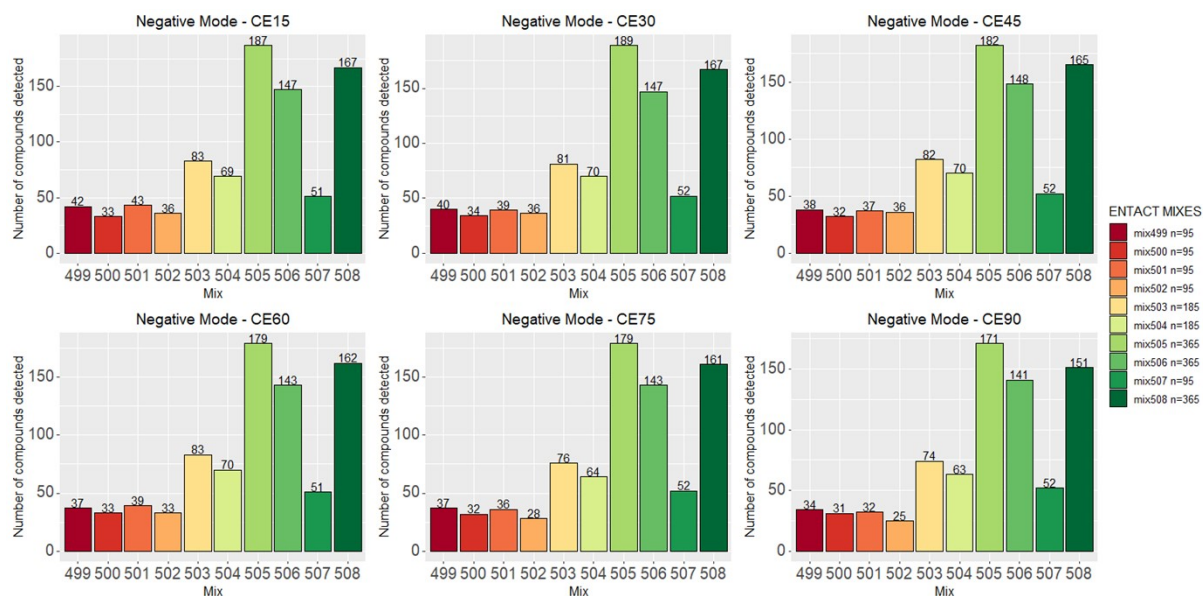

Figure S3: Prescreening results, negative mode.

Table S1: The number of compounds that passed quality control in ShinyScreen.

| Mix | Total no. of compounds in each mix | No. of Compounds that passed the QC Positive mode |      |      |      |      |      | No. of Compounds that passed the QC Negative mode |      |      |      |      |      |
|-----|------------------------------------|---------------------------------------------------|------|------|------|------|------|---------------------------------------------------|------|------|------|------|------|
|     |                                    | CE15                                              | CE30 | CE45 | CE60 | CE75 | CE90 | CE15                                              | CE30 | CE45 | CE60 | CE75 | CE90 |
| 499 | 95                                 | 44                                                | 47   | 46   | 45   | 44   | 46   | 42                                                | 40   | 38   | 37   | 37   | 34   |
| 500 | 95                                 | 36                                                | 37   | 39   | 38   | 38   | 39   | 33                                                | 34   | 32   | 33   | 32   | 31   |
| 501 | 95                                 | 51                                                | 46   | 49   | 46   | 45   | 43   | 43                                                | 39   | 37   | 39   | 36   | 32   |
| 502 | 95                                 | 34                                                | 38   | 32   | 33   | 32   | 33   | 36                                                | 36   | 36   | 33   | 28   | 25   |
| 503 | 185                                | 95                                                | 97   | 93   | 89   | 96   | 95   | 83                                                | 81   | 82   | 83   | 76   | 74   |
| 504 | 185                                | 95                                                | 95   | 92   | 89   | 93   | 87   | 69                                                | 70   | 70   | 70   | 64   | 63   |
| 505 | 365                                | 199                                               | 197  | 197  | 191  | 196  | 192  | 187                                               | 189  | 182  | 179  | 179  | 171  |
| 506 | 365                                | 206                                               | 197  | 200  | 203  | 202  | 204  | 147                                               | 147  | 148  | 143  | 143  | 141  |
| 507 | 95                                 | 48                                                | 47   | 45   | 46   | 46   | 45   | 51                                                | 52   | 52   | 51   | 52   | 52   |
| 508 | 365                                | 203                                               | 198  | 197  | 192  | 193  | 195  | 167                                               | 167  | 165  | 162  | 161  | 151  |
